# Supplementary material for: Assessment of a tiling energy budget approach in a land surface model, ORCHIDEE-MICT (r8205)
Source: Copernicus journal article supplement (doi:10.5194/gmd-17-4727-2024), 2024-06-18
Supplement: Supplementary file 1 [file gmd-17-4727-2024-supplement.pdf]

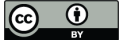

*Supplement of*

**Assessment of a tiling energy budget approach in a land surface model,  
ORCHIDEE-MICT (r8205)**

**Yi Xi et al.**

*Correspondence to:* Yi Xi (yi.xi@lsce.ipsl.fr)

The copyright of individual parts of the supplement might differ from the article licence.

**Table S1. Visible and near infrared albedo of 15 plant function types (PFT) used in ORCHIDEE-MICT. The “Albedo” in the last column represents the average of visible and near infrared albedo.**

| <b>PFT</b>                            | <b>Visible albedo</b> | <b>Near infrared albedo</b> | <b>Albedo</b> |
|---------------------------------------|-----------------------|-----------------------------|---------------|
| 2. Tropical broad-leaved evergreen    | 0.0397                | 0.227                       | 0.13335       |
| 3. Tropical broad-leaved raingreen    | 0.0474                | 0.214                       | 0.13070       |
| 4. Temperate needleleaf evergreen     | 0.0386                | 0.193                       | 0.11580       |
| 5. Temperate broad-leaved evergreen   | 0.0484                | 0.208                       | 0.12820       |
| 6. Temperate broad-leaved summergreen | 0.0411                | 0.244                       | 0.14255       |
| 7. Boreal needleleaf evergreen        | 0.0410                | 0.177                       | 0.10900       |
| 8. Boreal broad-leaved summergreen    | 0.0541                | 0.218                       | 0.13605       |
| 9. Boreal needleleaf summergreen      | 0.0435                | 0.213                       | 0.12825       |
| 10. Temperate C3 grass                | 0.0524                | 0.252                       | 0.15220       |
| 11. C4 grass                          | 0.0508                | 0.265                       | 0.15790       |
| 12. Wheat                             | 0.0509                | 0.272                       | 0.16145       |
| 13. Maize                             | 0.0606                | 0.244                       | 0.15230       |
| 14. Tropical C3 grass                 | 0.0524                | 0.252                       | 0.15220       |
| 15. Boreal C3 grass                   | 0.0524                | 0.252                       | 0.15220       |
| 16. Peat C3 grass                     | 0.0524                | 0.252                       | 0.15220       |

25 Table S2. The vertical discretization of soil layers in ORCHIDEE-MICT. There are 11 soil layers for hydrology and 32 soil layers for thermal in the model, and the depth of 11 hydrologic layers is identical to that of the first 11 thermal layers. The thermal layers in red are selected to show the difference in thermal and hydrologic variables between MICT-teb and MICT in Figs. 8-9, S9-S13. The depth indicates the depth to the bottom of the layer.

| Hydrology  |           | Thermal    |           |
|------------|-----------|------------|-----------|
| Soil layer | Depth (m) | Soil layer | Depth (m) |
| 1          | 0.0010    | 1          | 0.0010    |
| 2          | 0.0039    | 2          | 0.0039    |
| 3          | 0.0098    | 3          | 0.0098    |
| 4          | 0.0215    | 4          | 0.0215    |
| 5          | 0.0450    | 5          | 0.0450    |
| 6          | 0.0919    | 6          | 0.0919    |
| 7          | 0.1857    | 7          | 0.1857    |
| 8          | 0.3734    | 8          | 0.3734    |
| 9          | 0.7488    | 9          | 0.7488    |
| 10         | 1.4995    | 10         | 1.4995    |
| 11         | 2.0000    | 11         | 2.0000    |
|            |           | 12         | 3.0010    |
|            |           | 13         | 4.0270    |
|            |           | 14         | 5.1043    |
|            |           | 15         | 6.2354    |
|            |           | 16         | 7.4232    |
|            |           | 17         | 8.6703    |
|            |           | 18         | 9.9798    |
|            |           | 19         | 11.3547   |
|            |           | 20         | 12.7984   |
|            |           | 21         | 14.3143   |
|            |           | 22         | 15.9059   |
|            |           | 23         | 17.5772   |
|            |           | 24         | 19.3320   |
|            |           | 25         | 21.1745   |
|            |           | 26         | 23.1092   |
|            |           | 27         | 25.1406   |
|            |           | 28         | 27.2736   |
|            |           | 29         | 29.5132   |
|            |           | 30         | 31.8649   |
|            |           | 31         | 34.3341   |
|            |           | 32         | 38.0000   |

30 **Table S3. Minimum snow albedo value after aging ( $\alpha_{\text{snow\_min}}$ ) and decay rate (k) of 16 plant function types (PFT) used in ORCHIDEE-MICT. Both visible and near infrared albedo are shown. Note that the two snow albedo parameters for PFT 2-16 in the model consider the shading effects of leaves, therefore with a smaller value than those on bare soil.**

| PFT                                   | $\alpha_{\text{snow\_min}}$ |               |         | k       |               |         |
|---------------------------------------|-----------------------------|---------------|---------|---------|---------------|---------|
|                                       | Visible                     | Near infrared | Average | Visible | Near infrared | Average |
| 1. Bare soil                          | 0.35                        | 0.35          | 0.35    | 0.45    | 0.45          | 0.45    |
| 2. Tropical broad-leaved evergreen    | 0                           | 0             | 0       | 0       | 0             | 0       |
| 3. Tropical broad-leaved raingreen    | 0                           | 0             | 0       | 0       | 0             | 0       |
| 4. Temperate needleleaf evergreen     | 0.14                        | 0.14          | 0.14    | 0.1     | 0.06          | 0.08    |
| 5. Temperate broad-leaved evergreen   | 0.14                        | 0.14          | 0.14    | 0.06    | 0.06          | 0.06    |
| 6. Temperate broad-leaved summergreen | 0.14                        | 0.14          | 0.14    | 0.11    | 0.11          | 0.11    |
| 7. Boreal needleleaf evergreen        | 0.14                        | 0.14          | 0.14    | 0.10    | 0.06          | 0.08    |
| 8. Boreal broad-leaved summergreen    | 0.14                        | 0.14          | 0.14    | 0.11    | 0.11          | 0.11    |
| 9. Boreal needleleaf summergreen      | 0.14                        | 0.14          | 0.14    | 0.18    | 0.11          | 0.145   |
| 10. Temperate C3 grass                | 0.18                        | 0.18          | 0.18    | 0.60    | 0.52          | 0.56    |
| 11. C4 grass                          | 0.18                        | 0.18          | 0.18    | 0.60    | 0.52          | 0.56    |
| 12. Wheat                             | 0.18                        | 0.18          | 0.18    | 0.60    | 0.52          | 0.56    |
| 13. Maize                             | 0.18                        | 0.18          | 0.18    | 0.60    | 0.5           | 0.55    |
| 14. Tropical C3 grass                 | 0.18                        | 0.18          | 0.18    | 0.60    | 0.52          | 0.56    |
| 15. Boreal C3 grass                   | 0.18                        | 0.18          | 0.18    | 0.60    | 0.52          | 0.56    |
| 16. Peat C3 grass                     | 0.18                        | 0.18          | 0.18    | 0.60    | 0.52          | 0.56    |

**Table S4. Roughness height of 16 plant function types (PFT) used in ORCHIDEE-MICT.**

| <b>PFT</b>                            | <b>Roughness height (m)</b> |
|---------------------------------------|-----------------------------|
| 1. Bare soil                          | 0                           |
| 2. Tropical broad-leaved evergreen    | 10.2                        |
| 3. Tropical broad-leaved raingreen    | 10.2                        |
| 4. Temperate needleleaf evergreen     | 6.8                         |
| 5. Temperate broad-leaved evergreen   | 6.8                         |
| 6. Temperate broad-leaved summergreen | 6.8                         |
| 7. Boreal needleleaf evergreen        | 5.1                         |
| 8. Boreal broad-leaved summergreen    | 5.1                         |
| 9. Boreal needleleaf summergreen      | 5.1                         |
| 10. Temperate C3 grass                | 0.17                        |
| 11. C4 grass                          | 0.204                       |
| 12. Wheat                             | 0.34                        |
| 13. Maize                             | 0.34                        |
| 14. Tropical C3 grass                 | 0.17                        |
| 15. Boreal C3 grass                   | 0.17                        |
| 16. Peat C3 grass                     | 0.17                        |

**Table S5. Correlation coefficients (R) between differences in  $T_{\text{snow}}$  ( $\Delta T_{\text{snow}}$ ) and  $T_{\text{surf}}$  ( $\Delta T_{\text{surf}}$ ), or  $c_{\text{snow}}$  ( $\Delta c_{\text{snow}}$ ), or  $\lambda_{\text{snow}}$  ( $\Delta \lambda_{\text{snow}}$ ) for each snow layer and the snow depth weighted results. The numbers in red indicate the maximum coefficient among the three factors. The numbers in bold indicate the correlation coefficients are statistically significant ( $p < 0.05$ ).**

| R              | Layer 1                  |                          |                                | Layer 2                  |                          |                                | Layer 3                  |                          |                                | Snow depth weighted      |                          |                                |
|----------------|--------------------------|--------------------------|--------------------------------|--------------------------|--------------------------|--------------------------------|--------------------------|--------------------------|--------------------------------|--------------------------|--------------------------|--------------------------------|
|                | $\Delta T_{\text{surf}}$ | $\Delta c_{\text{snow}}$ | $\Delta \lambda_{\text{snow}}$ | $\Delta T_{\text{surf}}$ | $\Delta c_{\text{snow}}$ | $\Delta \lambda_{\text{snow}}$ | $\Delta T_{\text{surf}}$ | $\Delta c_{\text{snow}}$ | $\Delta \lambda_{\text{snow}}$ | $\Delta T_{\text{surf}}$ | $\Delta c_{\text{snow}}$ | $\Delta \lambda_{\text{snow}}$ |
| Grid-cell mean | <b>0.17</b>              | -0.09                    | -0.08                          | <b>0.12</b>              | -0.03                    | -0.03                          | <b>0.09</b>              | 0.03                     | <b>0.05</b>                    | <b>0.09</b>              | 0.02                     | <b>0.04</b>                    |
| Bare soil      | <b>0.23</b>              | <b>0.10</b>              | <b>0.21</b>                    | <b>0.09</b>              | <b>0.12</b>              | <b>0.22</b>                    | 0.04                     | <b>0.14</b>              | <b>0.22</b>                    | <b>0.07</b>              | <b>0.13</b>              | <b>0.24</b>                    |
| Tree           | <b>0.60</b>              | -0.14                    | -0.06                          | 0.04                     | <b>0.37</b>              | <b>0.40</b>                    | -0.29                    | <b>0.57</b>              | <b>0.55</b>                    | -0.13                    | <b>0.46</b>              | <b>0.49</b>                    |
| Grass          | <b>0.69</b>              | <b>0.16</b>              | <b>0.23</b>                    | <b>0.50</b>              | <b>0.32</b>              | <b>0.40</b>                    | <b>0.19</b>              | <b>0.41</b>              | <b>0.44</b>                    | <b>0.38</b>              | <b>0.36</b>              | <b>0.42</b>                    |
| Peat grass     | <b>0.16</b>              | -0.02                    | 0.03                           | <b>0.33</b>              | -0.26                    | -0.25                          | <b>0.33</b>              | -0.20                    | -0.20                          | <b>0.26</b>              | -0.14                    | -0.13                          |

40

Table S6. Correlation coefficients (R) between differences in  $T_{\text{soil}}$  ( $\Delta T_{\text{soil}}$ ) and  $T_{\text{surf}}$  ( $\Delta T_{\text{surf}}$ , for 0-30N) / the temperature at the third snow layer ( $\Delta T_{\text{snow},3}$ , for 30N-90N), or c ( $\Delta c$ ), or  $\lambda$  ( $\Delta \lambda$ ) for four soil layers. The numbers in red indicate the maximum coefficient among the three factors. The numbers in bold indicate the correlation coefficients are statistically significant ( $p < 0.05$ ).

| R              | Latitudes | Layer 1 (0.0005 m)                                           |            |                  | Layer 9 (0.56 m)                                             |             |                  | Layer 11 (1.72 m)                                            |             |                  | Layer 32 (36.17 m)                                           |             |                  |
|----------------|-----------|--------------------------------------------------------------|------------|------------------|--------------------------------------------------------------|-------------|------------------|--------------------------------------------------------------|-------------|------------------|--------------------------------------------------------------|-------------|------------------|
|                |           | $\Delta T_{\text{surf}}$<br>or<br>$\Delta T_{\text{snow},3}$ | $\Delta c$ | $\Delta \lambda$ | $\Delta T_{\text{surf}}$<br>or<br>$\Delta T_{\text{snow},3}$ | $\Delta c$  | $\Delta \lambda$ | $\Delta T_{\text{surf}}$<br>or<br>$\Delta T_{\text{snow},3}$ | $\Delta c$  | $\Delta \lambda$ | $\Delta T_{\text{surf}}$<br>or<br>$\Delta T_{\text{snow},3}$ | $\Delta c$  | $\Delta \lambda$ |
| Grid-cell mean | 30N-90N   | <b>0.31</b>                                                  | -0.29      | -0.07            | <b>0.32</b>                                                  | <b>0.34</b> | -0.29            | <b>0.32</b>                                                  | 0.10        | -0.24            | <b>0.30</b>                                                  | -0.02       | <b>-0.36</b>     |
|                | 0-30N     | <b>1.00</b>                                                  | 0.00       | <b>0.44</b>      | <b>1.00</b>                                                  | -0.02       | <b>0.22</b>      | <b>1.00</b>                                                  | <b>0.11</b> | <b>0.19</b>      | <b>0.98</b>                                                  | <b>0.17</b> | <b>-0.05</b>     |
| Bare soil      | 30N-90N   | <b>0.34</b>                                                  | -0.14      | -0.09            | <b>0.38</b>                                                  | -0.06       | <b>0.06</b>      | <b>0.33</b>                                                  | -0.14       | <b>0.09</b>      | <b>0.39</b>                                                  | -0.03       | <b>-0.14</b>     |
|                | 0-30N     | <b>1.00</b>                                                  | -0.17      | <b>0.77</b>      | <b>1.00</b>                                                  | -0.03       | <b>0.75</b>      | <b>1.00</b>                                                  | <b>0.11</b> | <b>0.31</b>      | <b>0.99</b>                                                  | <b>0.25</b> | <b>0.19</b>      |
| Tree           | 30N-90N   | <b>0.77</b>                                                  | -0.12      | -0.09            | <b>0.76</b>                                                  | -0.04       | -0.09            | <b>0.75</b>                                                  | -0.09       | -0.24            | <b>0.68</b>                                                  | -0.45       | <b>-0.56</b>     |
|                | 0-30N     | <b>1.00</b>                                                  | -0.23      | <b>0.49</b>      | <b>1.00</b>                                                  | -0.07       | <b>0.50</b>      | <b>1.00</b>                                                  | <b>0.08</b> | <b>0.19</b>      | <b>0.90</b>                                                  | -0.13       | <b>-0.19</b>     |
| Grass          | 30N-90N   | <b>0.74</b>                                                  | -0.19      | <b>0.05</b>      | <b>0.69</b>                                                  | -0.31       | <b>0.11</b>      | <b>0.62</b>                                                  | -0.37       | <b>0.18</b>      | <b>0.59</b>                                                  | -0.36       | <b>-0.47</b>     |
|                | 0-30N     | <b>1.00</b>                                                  | -0.28      | <b>0.38</b>      | <b>1.00</b>                                                  | 0.00        | <b>0.75</b>      | <b>1.00</b>                                                  | <b>0.22</b> | <b>0.49</b>      | <b>0.96</b>                                                  | <b>0.32</b> | <b>0.27</b>      |
| Peat grass     | 30N-90N   | <b>0.66</b>                                                  | -0.17      | -0.60            | <b>0.54</b>                                                  | -0.15       | -0.44            | <b>0.41</b>                                                  | 0.00        | -0.17            | <b>0.45</b>                                                  | <b>0.28</b> | <b>-0.26</b>     |
|                | 0-30N     | <b>1.00</b>                                                  | -0.28      | -0.09            | <b>0.99</b>                                                  | -0.42       | -0.21            | <b>0.97</b>                                                  | -0.40       | 0.12             | <b>0.92</b>                                                  | -0.03       | -0.06            |

**Figure S1. Soil albedo used in ORCHIDEE-MICT.**

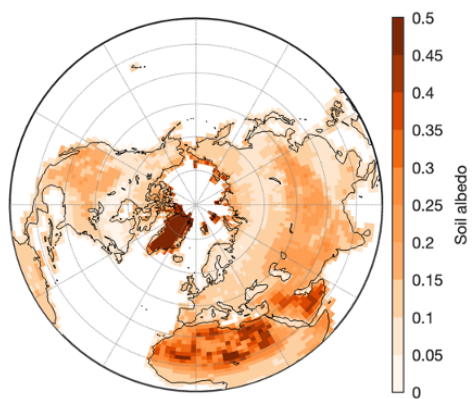



50 Figure S2. Comparison of vertical SOC profile (0-3 m) across different land cover types between site-level data from Palmtag et al., (2022) and simulation from ORCHIDEE-MICT. (a), Spatial distribution of 16 sites used in Palmtag et al., (2022). (b), The vertical profile of mean SOC density across all sites for 10 land cover types (DBF: deciduous broadleaf forest; ENF: evergreen needleleaf forest; DNF: deciduous needleleaf forest; Shrub: shrub tundra; Graminoid: graminoid for tundra; PerWet: permafrost wetlands; NPWet: non-permafrost wetland; Barren: barren; YeTundra: yedoma tundra; YeForest: yedoma forest) from Palmtag et al., (2022).  
 55 (c), The vertical profile of mean SOC density across all sites for 8 PFTs (EBF: evergreen broadleaf forest; ENF: evergreen needleleaf forest; DBF: deciduous broadleaf forest; DNF: deciduous needleleaf forest; C3C: C3 crop; C4C: C4 crop; C3G: C3 grass; Peat C3G: peatland C3 grass) from ORCHIDEE-MICT. The PFTs without cover fraction and bare soil (without organic carbon) from the simulations are not shown here.

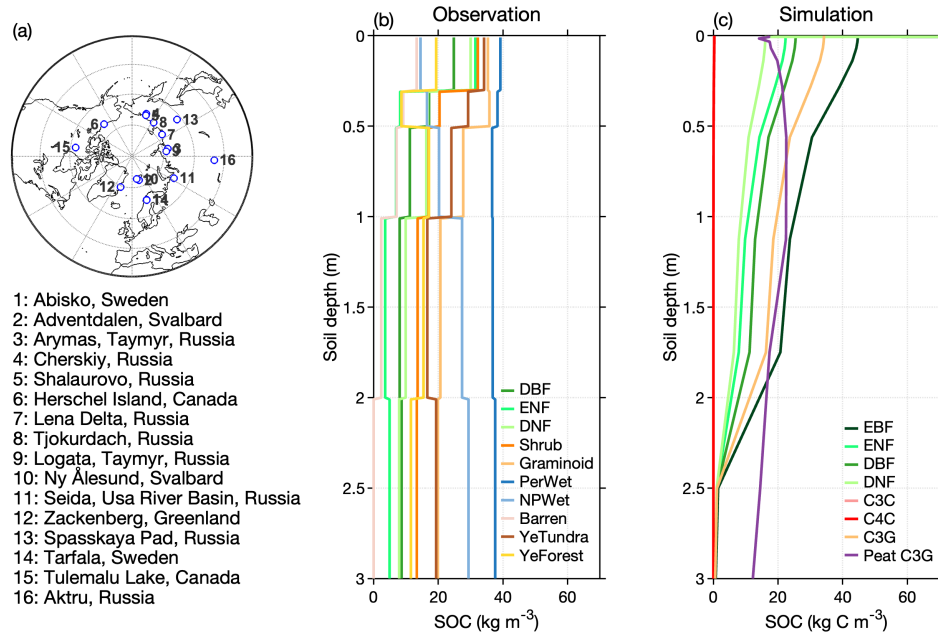

60

Figure S3. Comparison of spatial pattern of SOC for 0-3 m from the simulation from ORCHIDEE-MICT and observation-based data as used in Zhu et al. (2019). (a) ORCHIDEE-MICT; (b) the observation-based dataset; (c) the difference between ORCHIDEE-MICT and the observation-based dataset.

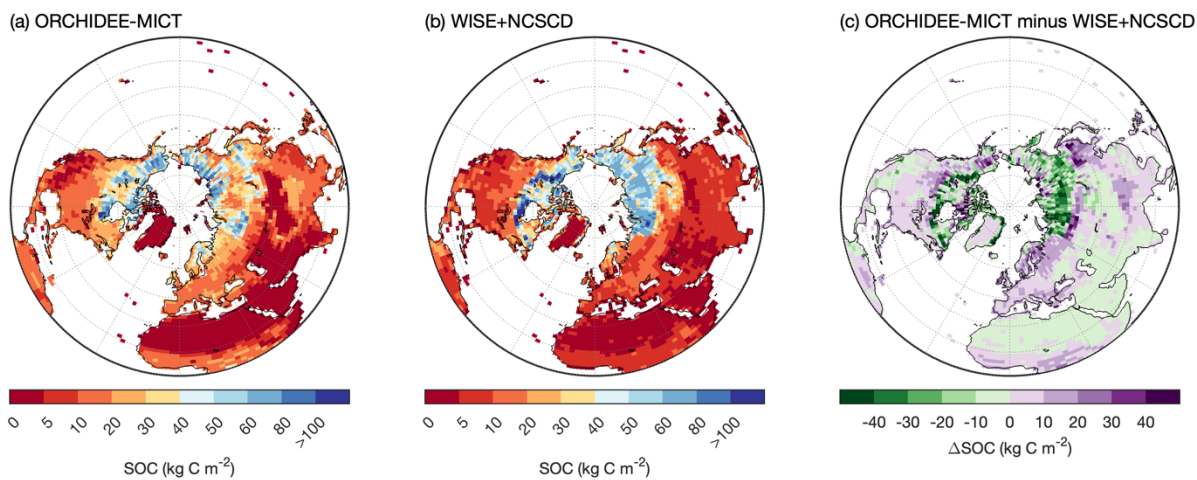

65

Figure S4. Same as Fig. 3, but for difference in snow cover fraction ( $f_{\text{snow}}$ ) between MICT-teb and MICT for two grid-cells located at temperate (51°N, 101°W) and boreal (71°N, 147°E) regions, respectively.

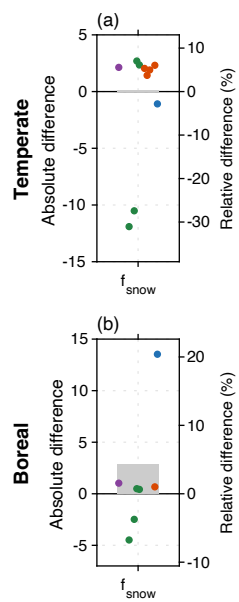

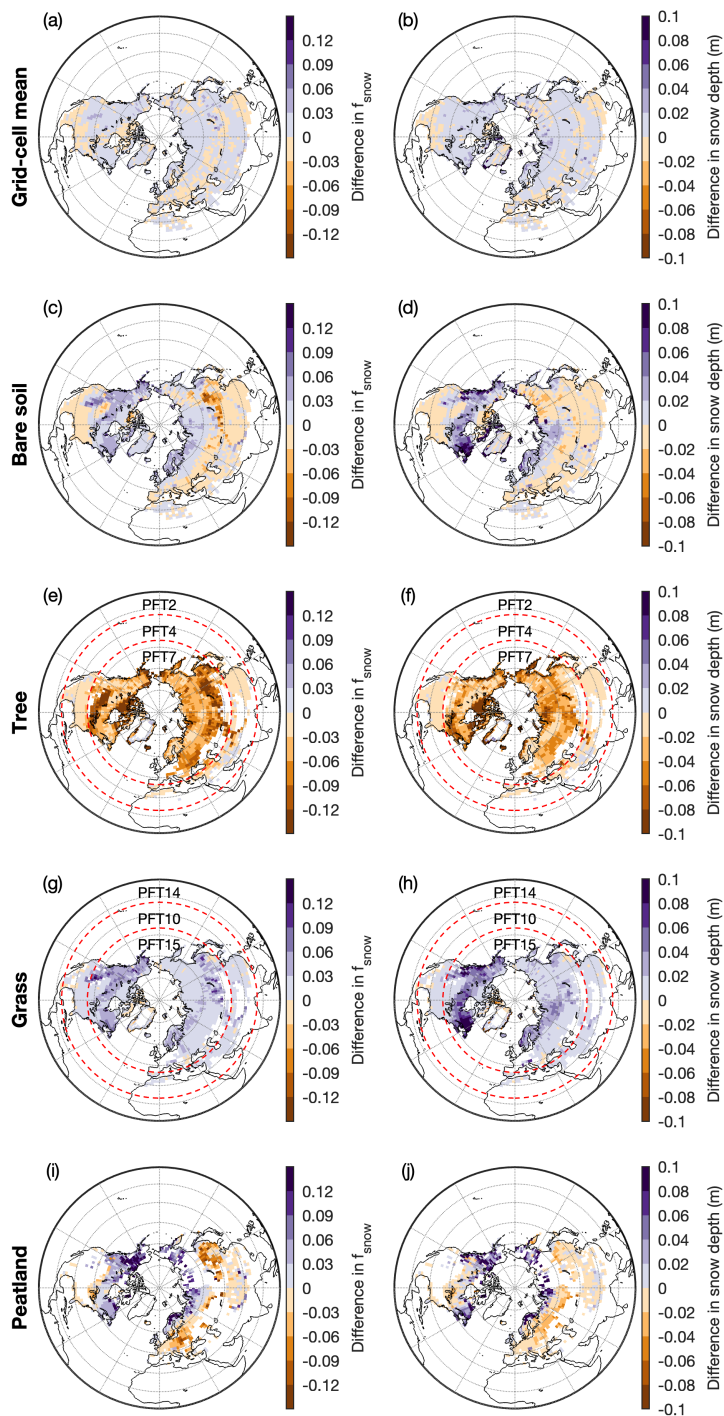

Figure S6. Same as Fig. 6, but for scatter plot of differences in surface properties between MICT-teb and MICT versus vegetation cover fraction for bare soil (PFT1), tree (PFT7), grass (PFT15), and peatland grass (PFT16). The surface properties include albedo (Albedo), surface temperature ( $T_{surf}$ ), surface drag coefficients ( $C_d$ ), and roughness height ( $H_{rough}$ ).

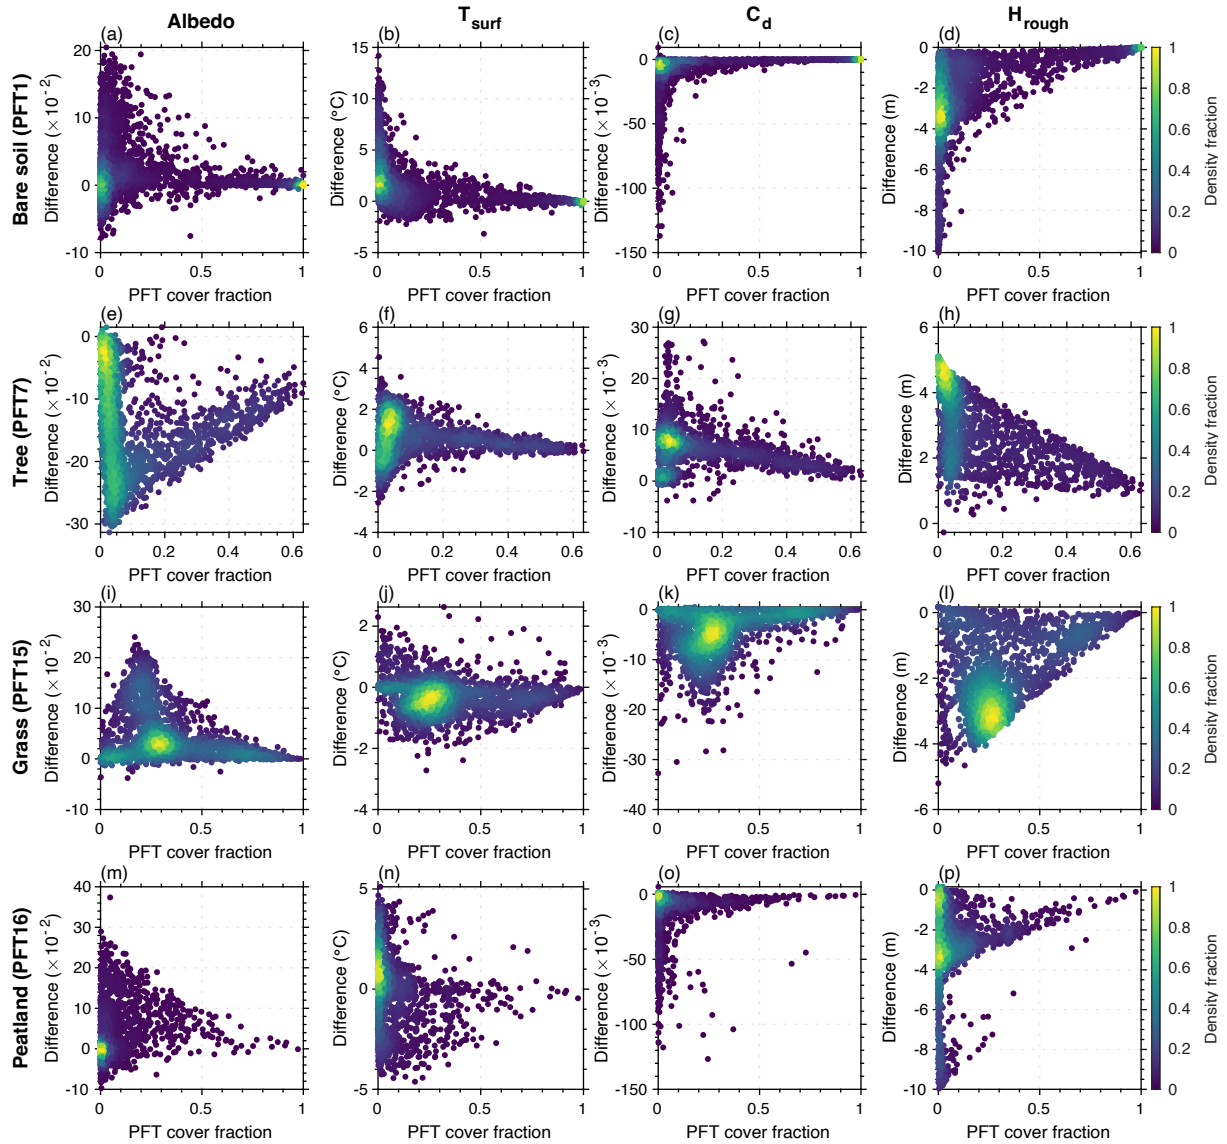

Figure S7. Spatial patterns of relative differences in snow heat capacity ( $c_{\text{snow}}$ ) between MICT-teb and MICT for three snow layers and the snow depth weighted results over the Northern Hemisphere.

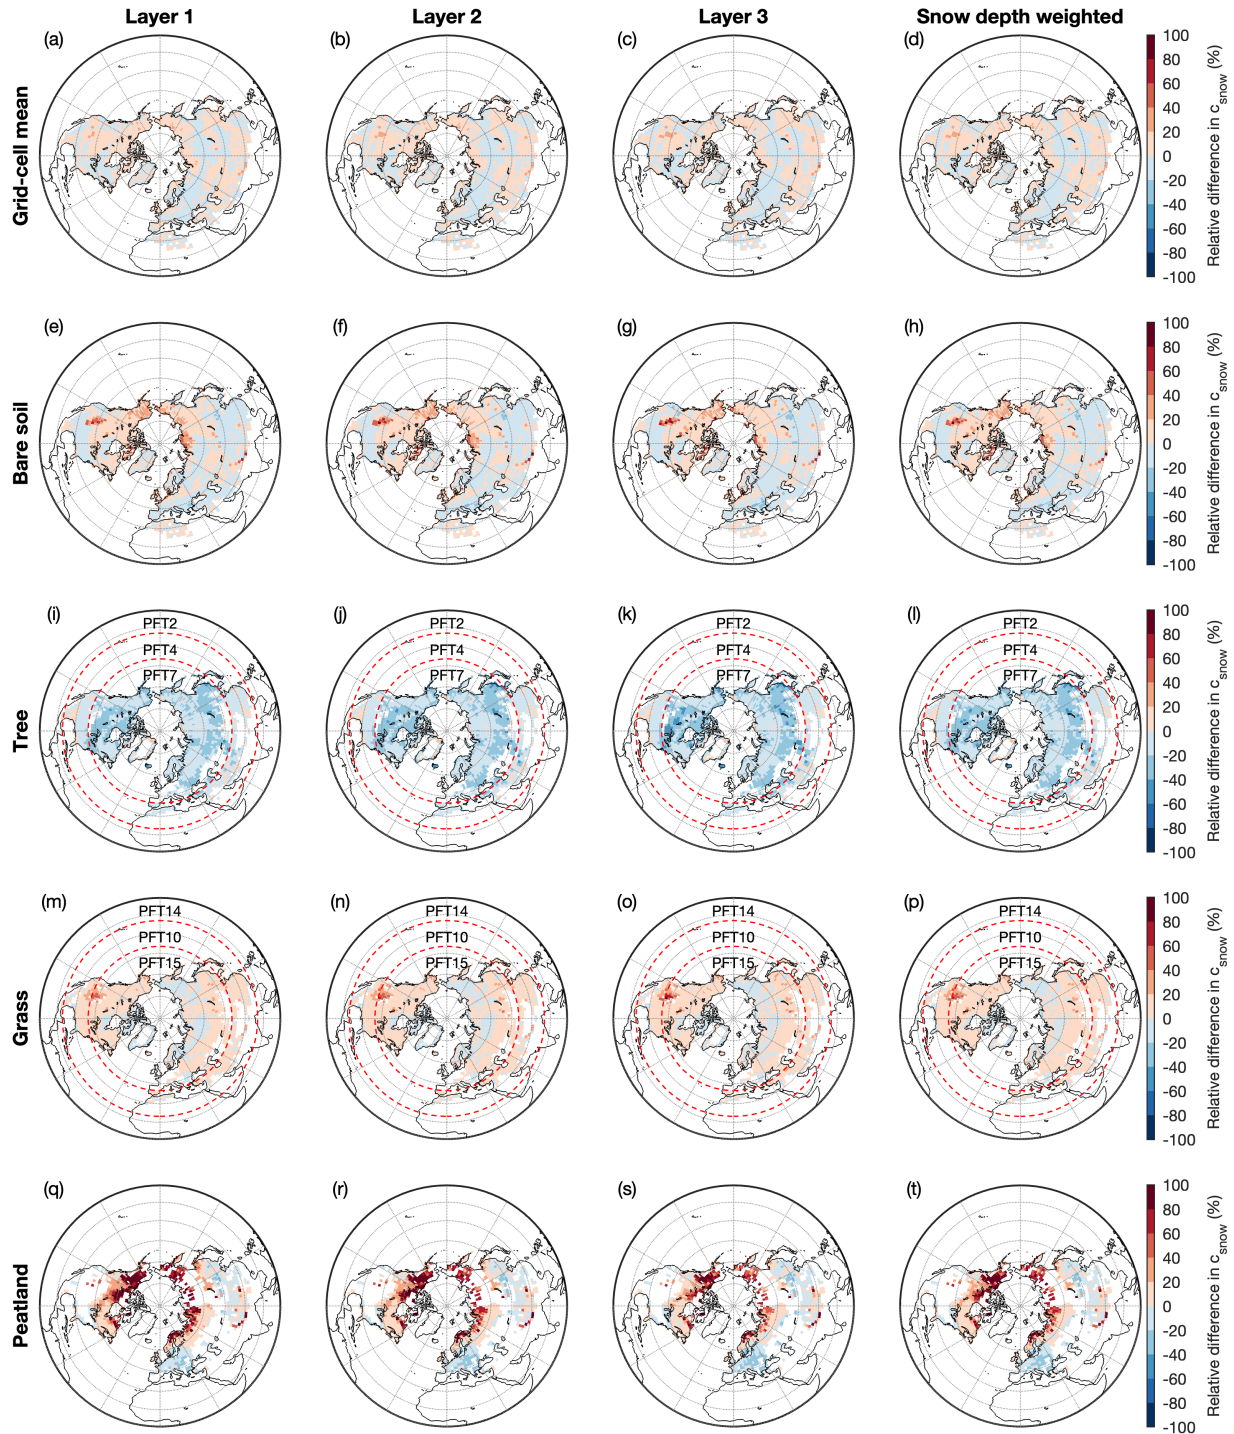

80 Figure S8. Spatial patterns of relative differences in snow thermal conductivity ( $\lambda_{\text{snow}}$ ) between MICT-teb and MICT for three snow layers and the snow depth weighted results over the Northern Hemisphere.

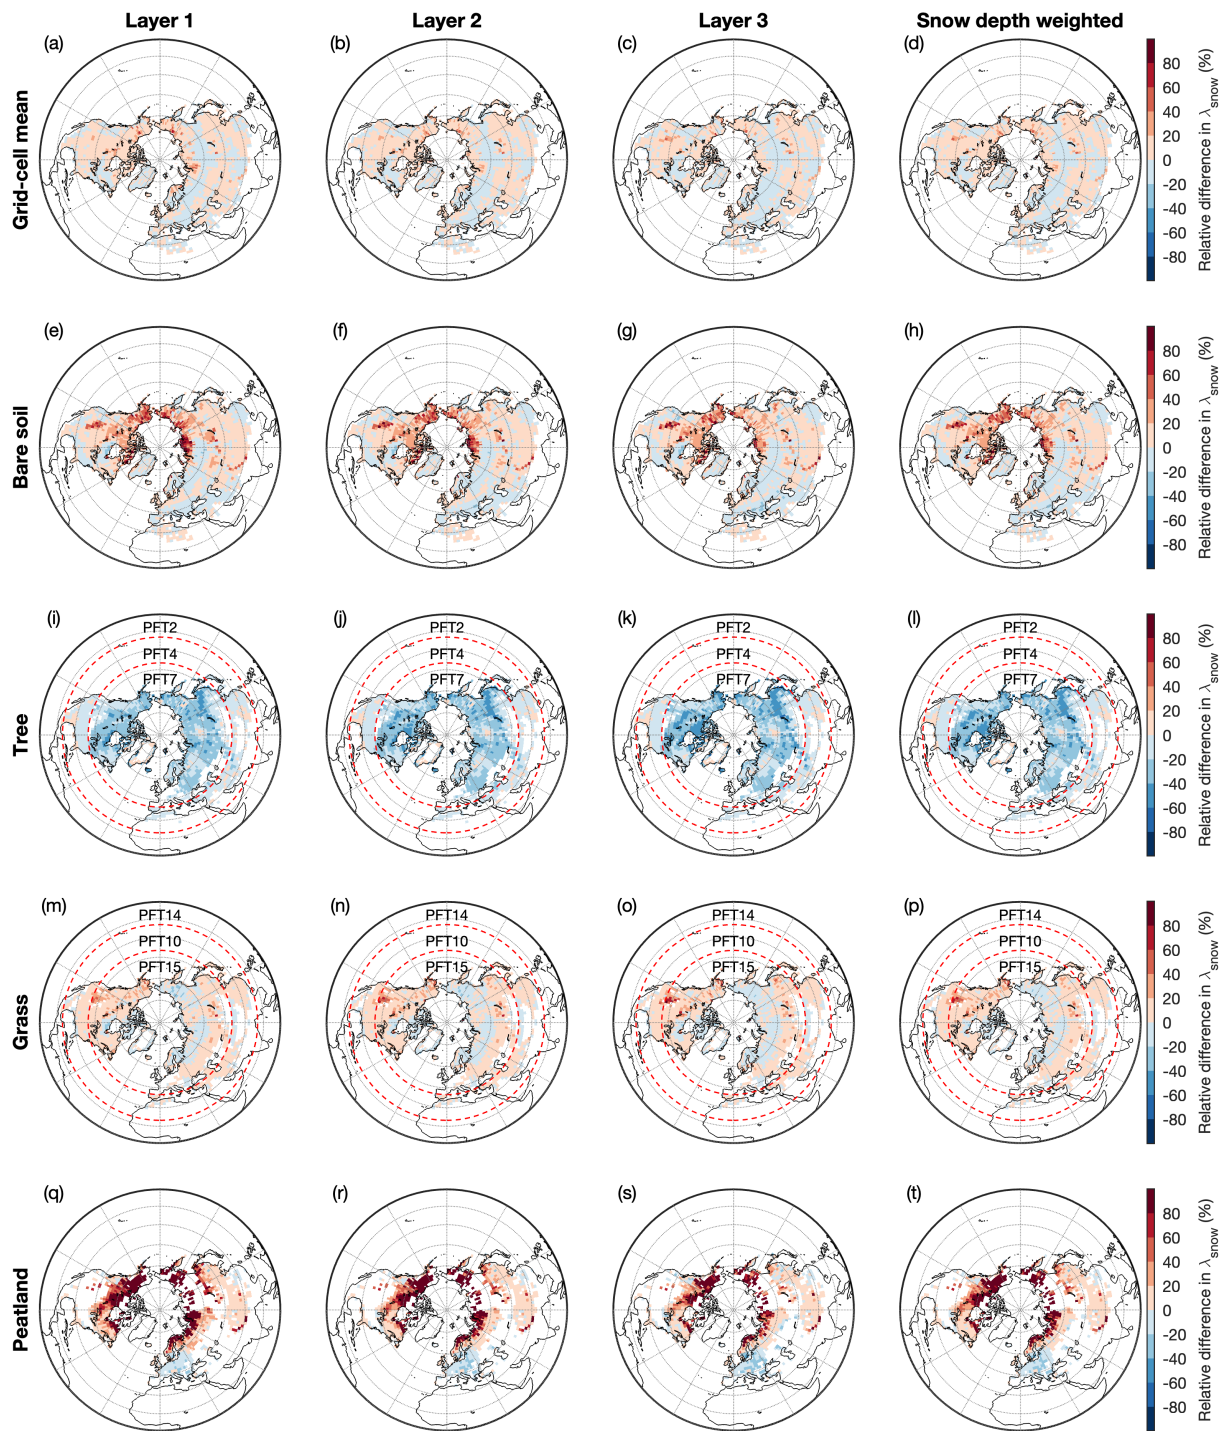

Figure S9. Spatial patterns of relative differences in soil heat capacity ( $c$ ) between MICT-teb and MICT for four soil layers over the Northern Hemisphere.

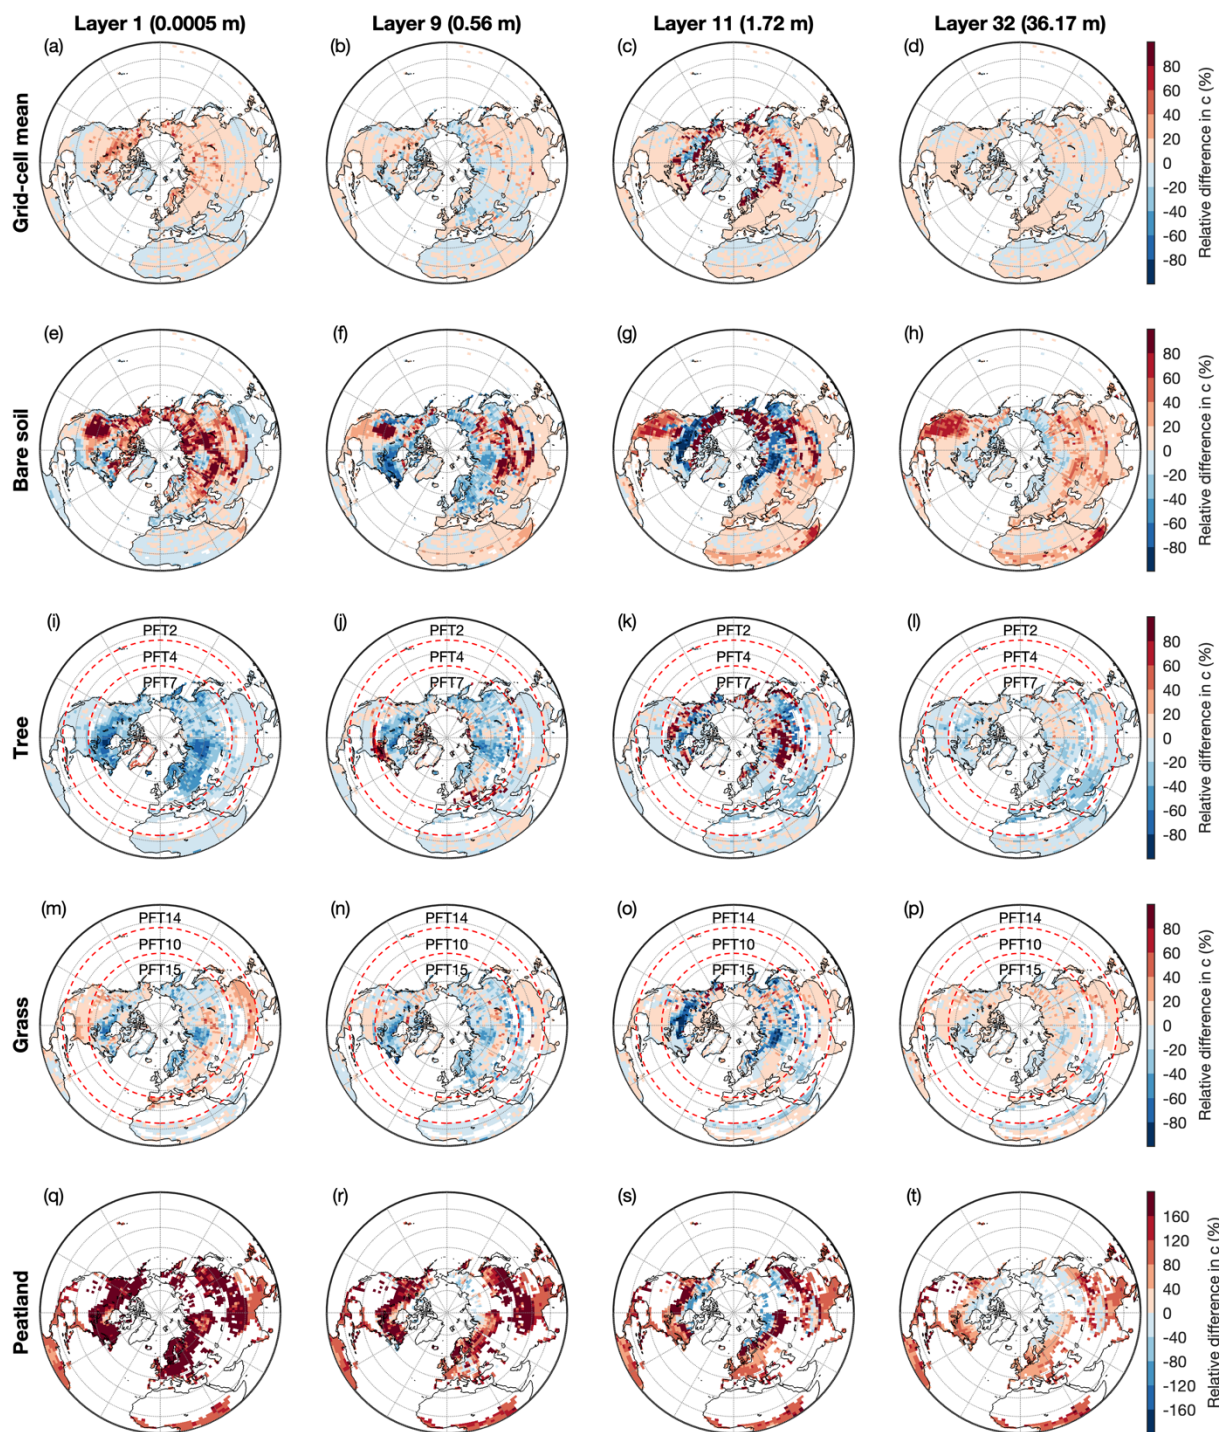



**Figure S10. Spatial patterns of relative differences in soil thermal conductivity ( $\lambda$ ) between MICT-teb and MICT for four soil layers over the Northern Hemisphere.**

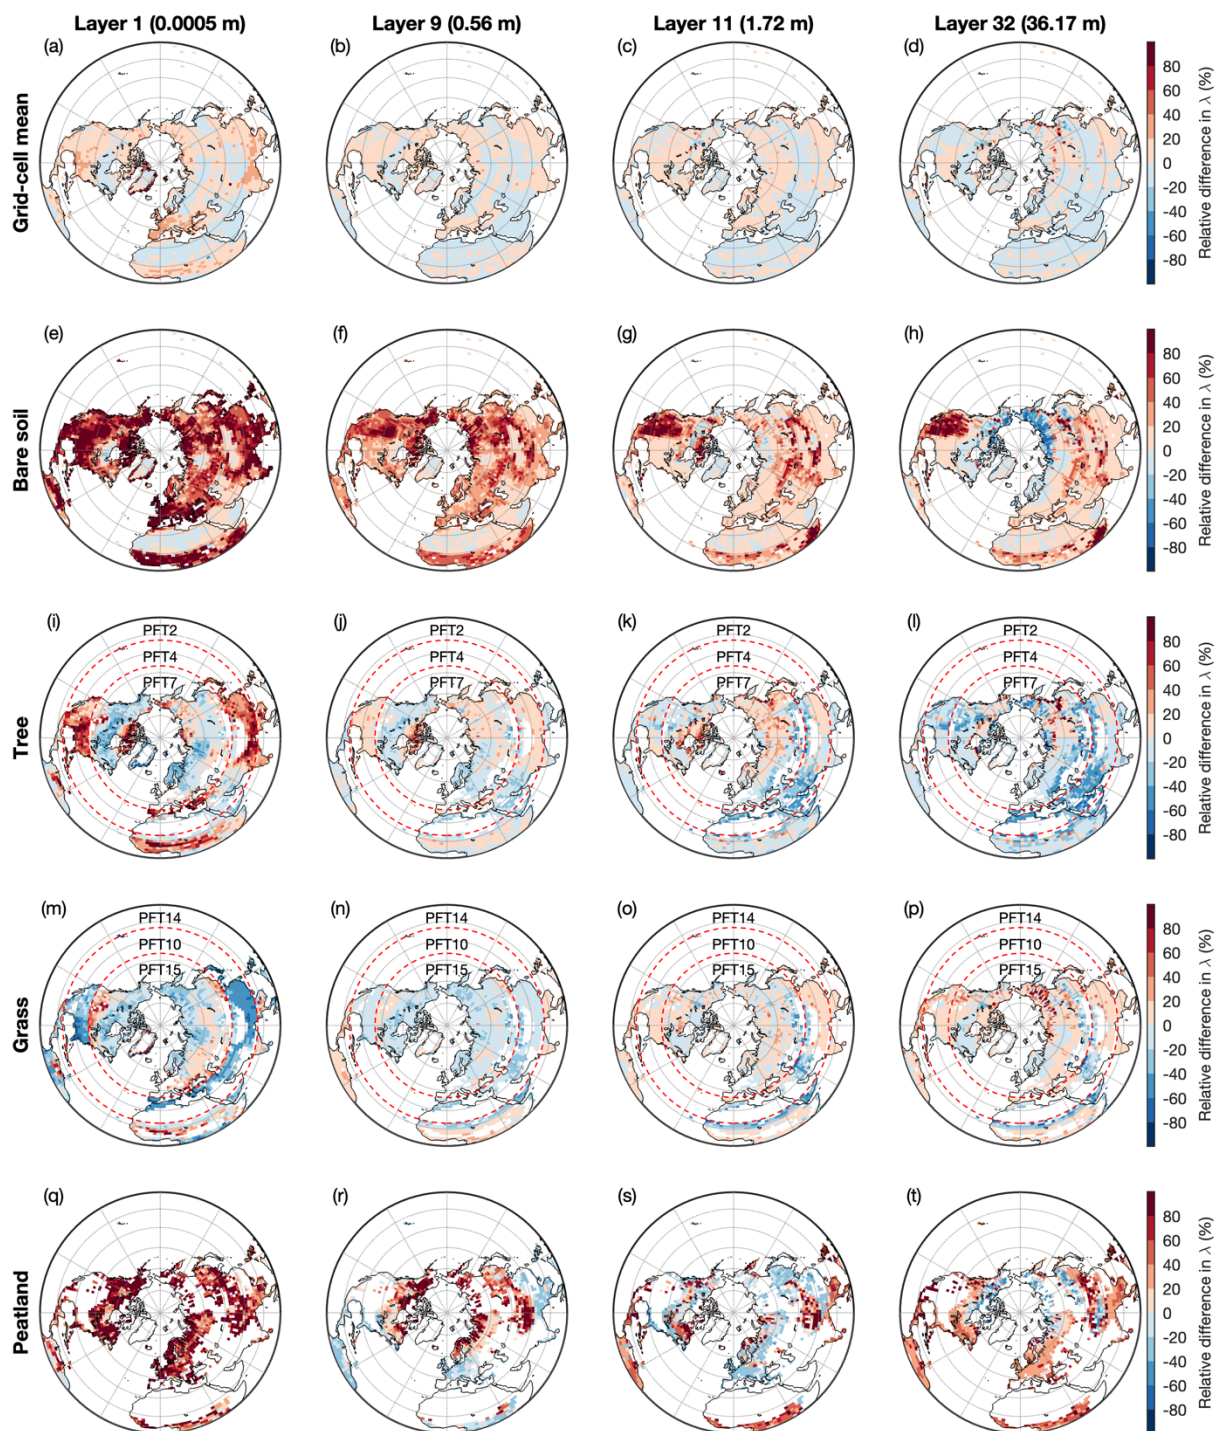

90 **Figure S11. Spatial patterns of relative differences in liquid soil moisture ( $SM_{\text{liquid}}$ ) between MICT-teb and MICT for four soil layers**  
**over the Northern Hemisphere. Please note that 1) the hydrology has only 11 layers, so the SM at the 11<sup>st</sup> layer is used for the 12<sup>nd</sup>**  
**to the 32<sup>nd</sup> thermal layers to calculate the thermal parameters, and the differences in the third and the last column are resulted from**  
**the different soil temperature in the two layers. 2) the MICT distincts SM for different soil tiles, but the grid-cell mean SM is used**  
95 **to calculated soil heat capacity (Fig. S9) and soil thermal conductivity (Fig. S10), so the differences here show the  $SM_{\text{liquid}}$  for one**  
**PFT for MICT-teb and the  $SM_{\text{liquid}}$  for the total grid-cell for MICT.**

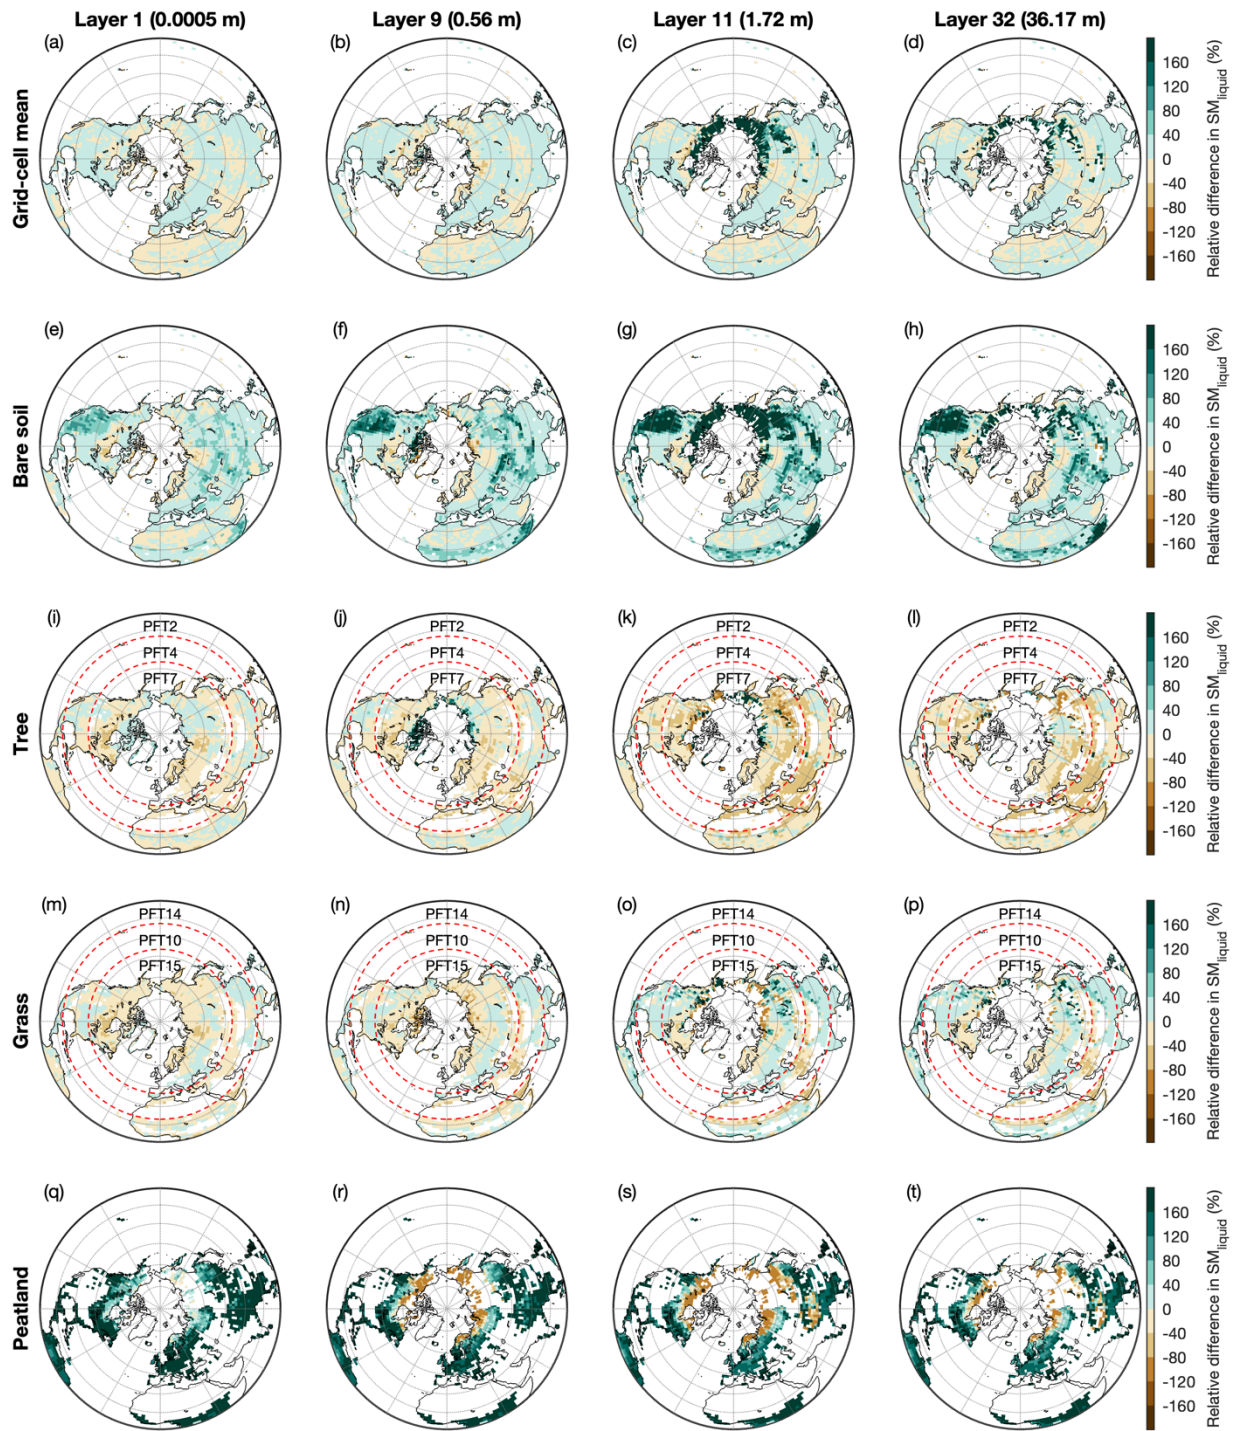

Figure S12. Same as Fig. S11, but for spatial patterns of relative differences in frozen soil moisture ( $SM_{frozen}$ ) between MICT-teb and MICT for four soil layers over the Northern Hemisphere.

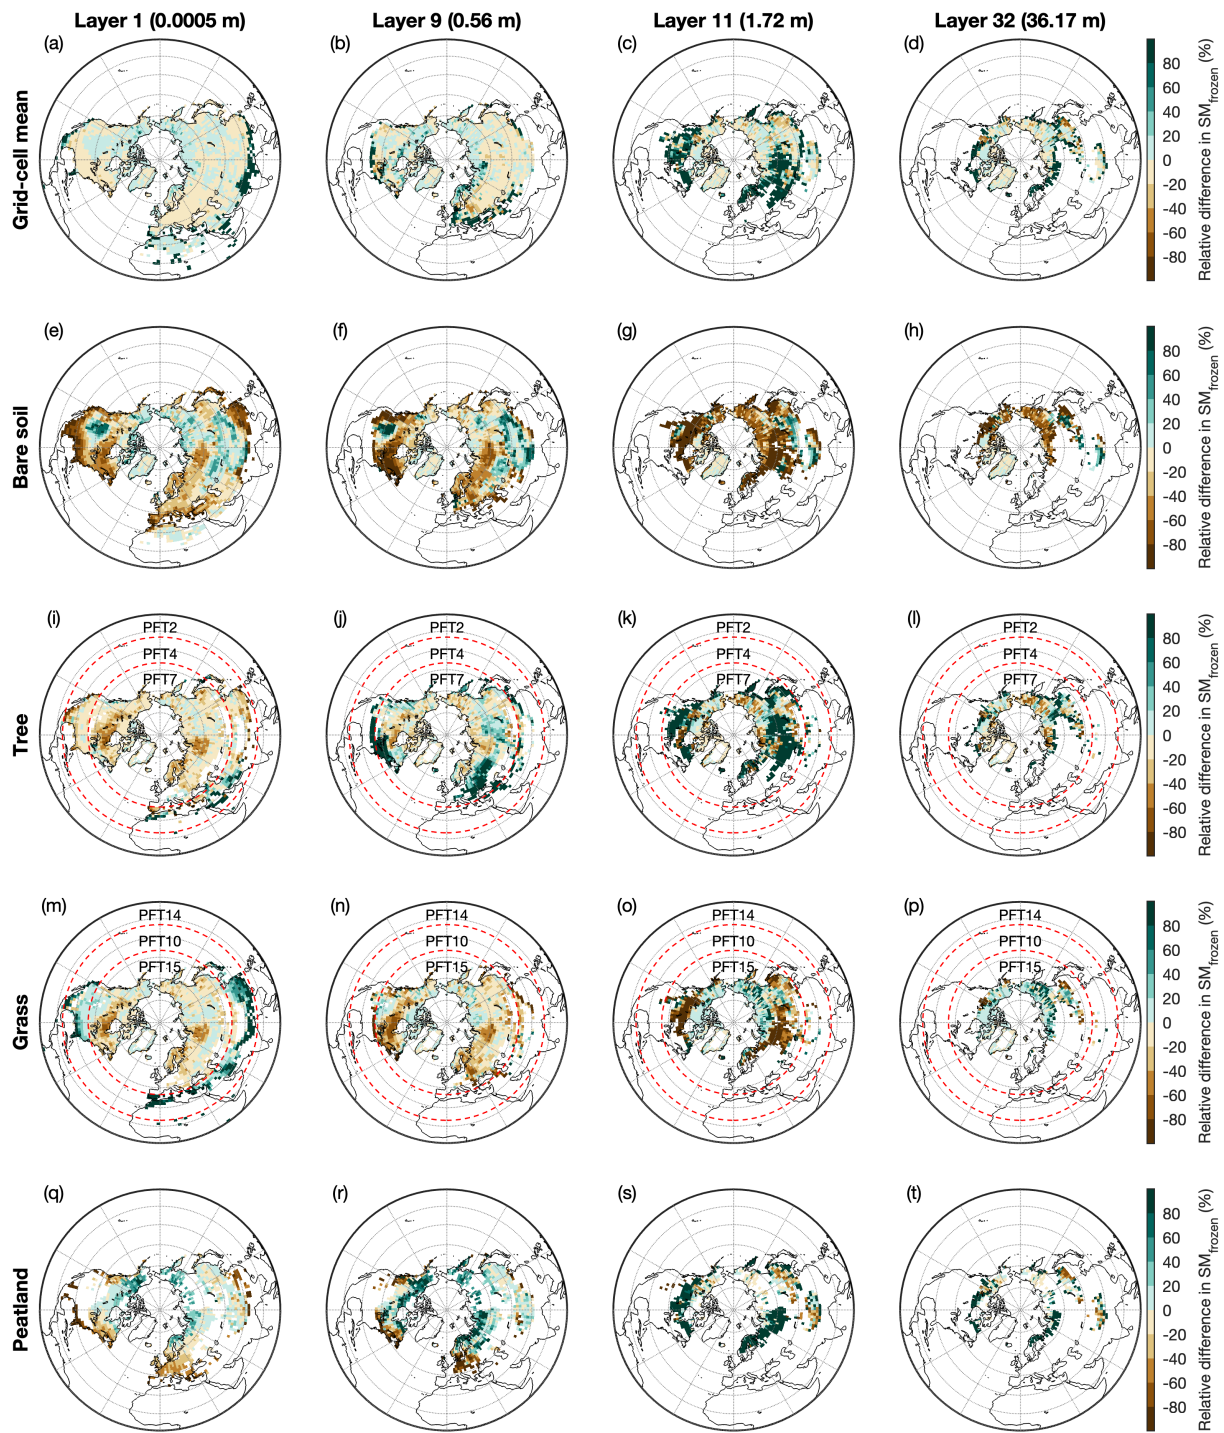

100 Figure S13. Same as Fig. S11, but for spatial patterns of relative differences in SOC between MICT-teb and MICT for four soil layers over the Northern Hemisphere. The Layer 32 is not shown here because there is no SOC in that layer.

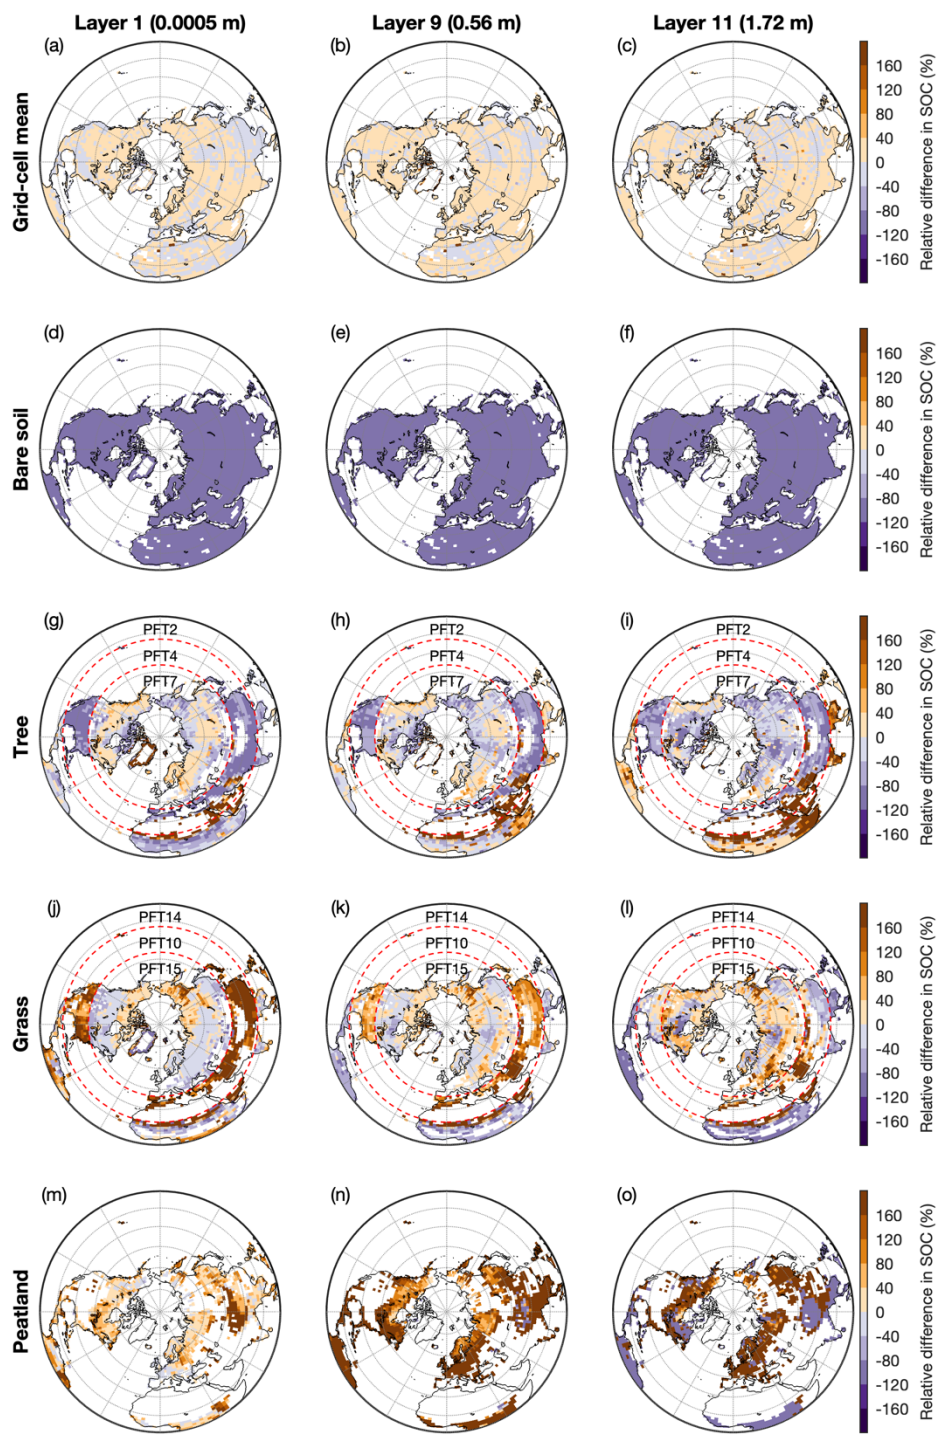

Figure S14. Differences in annual evapotranspiration (ET), soil evaporation ( $E_{\text{soil}}$ ), transpiration ( $E_{\text{trans}}$ ), interception ( $E_{\text{inter}}$ ), sublimation ( $E_{\text{subli}}$ ), soil moisture (SM), and snow for four soil tiles between S2 and S0. The annual values are calculated with the average of the last ten years. Considering the different cover fraction of the four soil tiles over the Northern Hemisphere, we use the units of per grid-cell rather than per PFT for the convenience of comparison.

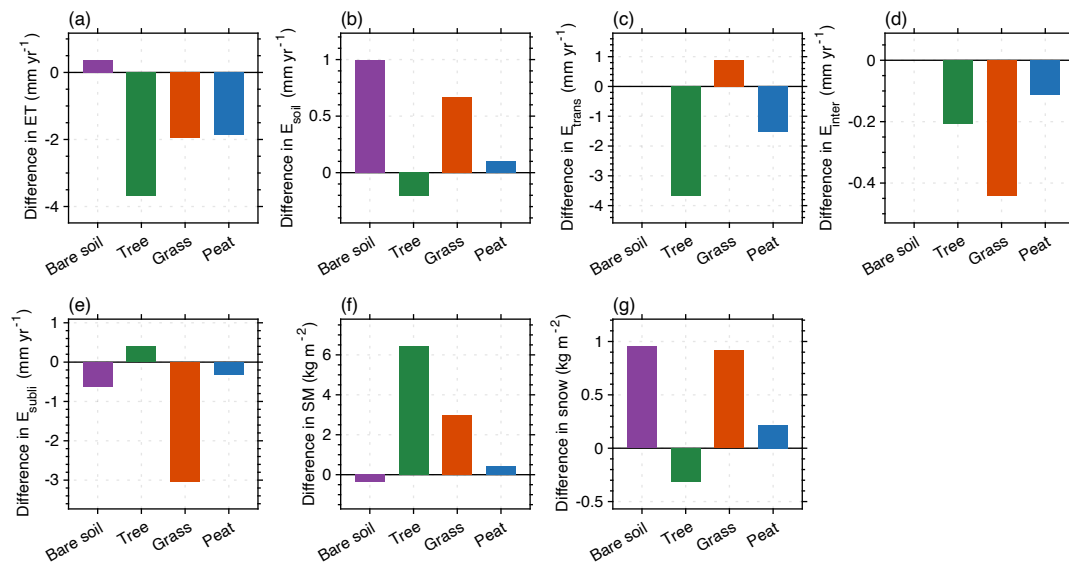

110 **Figure S15. Spatial patterns of differences in annual soil evaporation ( $E_{\text{soil}}$ ), transpiration ( $E_{\text{trans}}$ ), interception ( $E_{\text{inter}}$ ), and sublimation ( $E_{\text{subli}}$ ) for grid-cell mean and four soil tiles between S2 and S0. Consistent with Fig. S14, the annual values are calculated with the average of the last ten years and the units are per grid-cell. Areas with a zero flux for both S0 and S2 are masked out, for example in Fig. (f) and (g).**

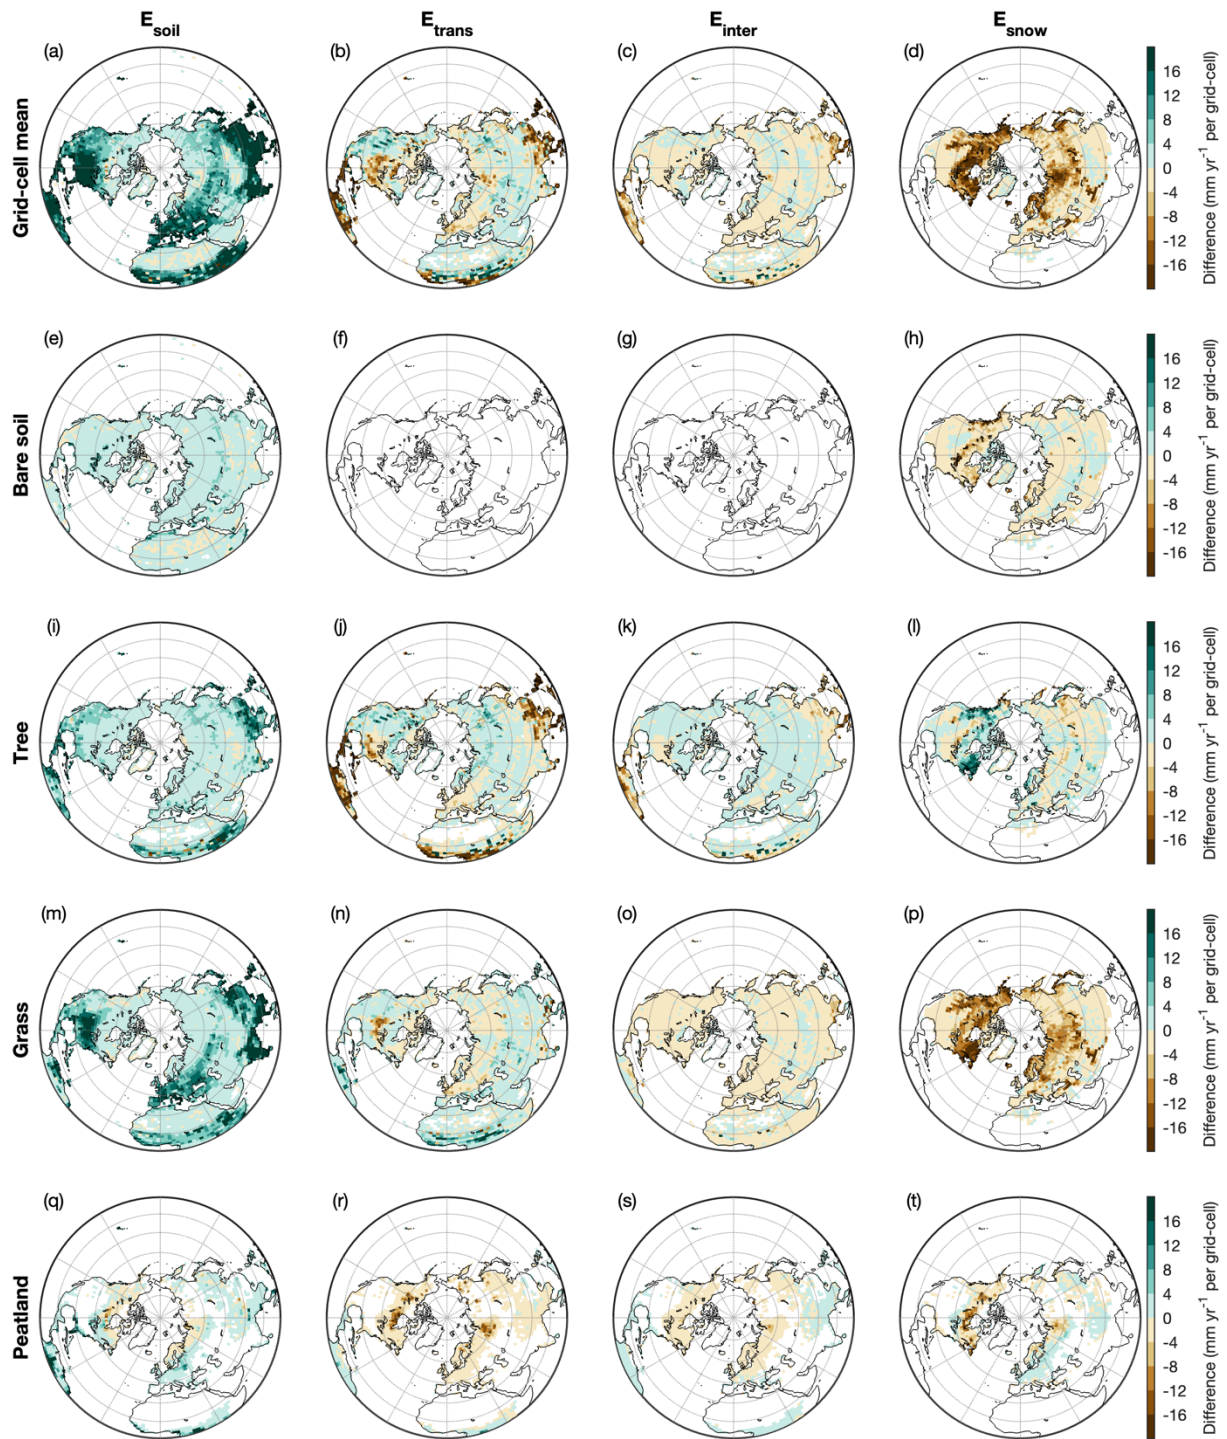



115 Figure S16. Spatial patterns of differences in annual  $T_{\text{soil}}$  and SM for grid-cell mean and four soil tiles between S2 and S0. The  $T_{\text{soil}}$  and SM represent the depth-weighted average for 0-38 m.

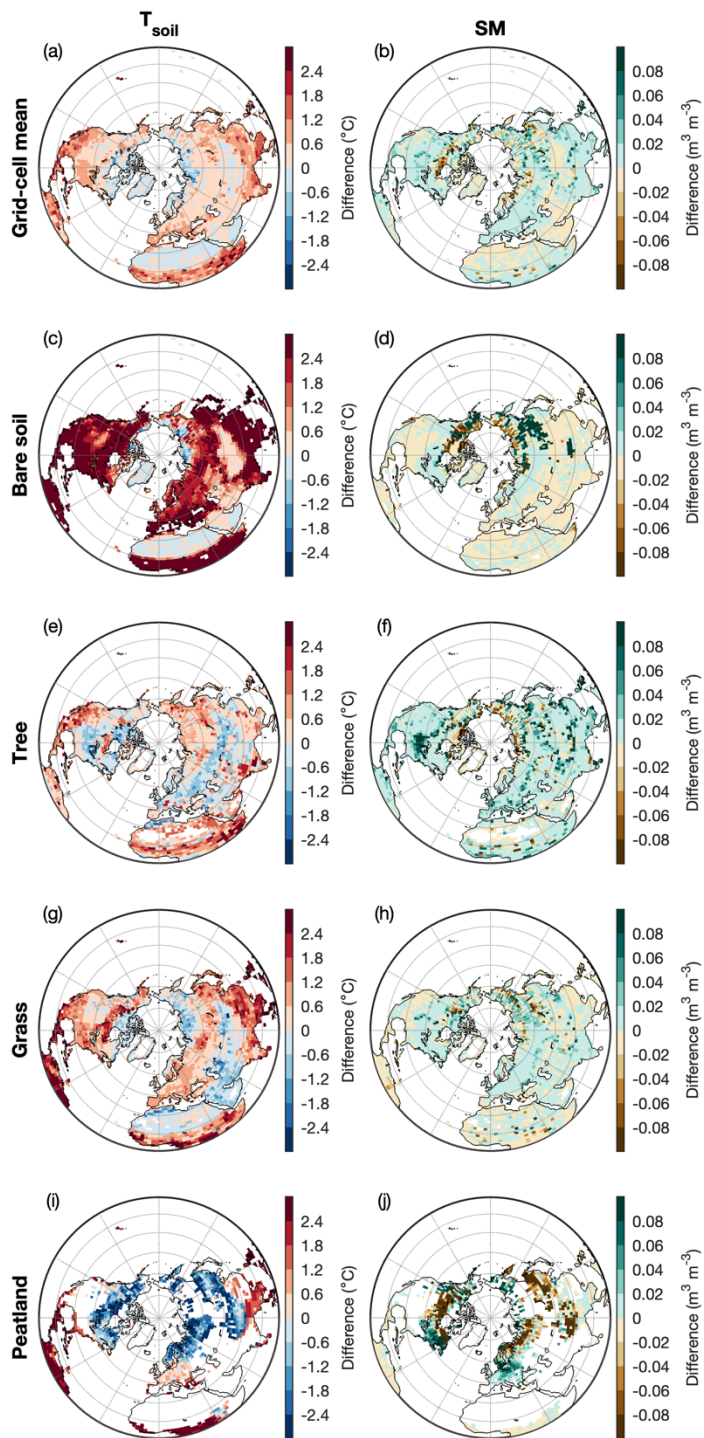

Figure S17. Spatial patterns of differences in annual GPP, NPP,  $R_h$ , and SOC for grid-cell mean and four soil tiles between S2 and S0. All maps are shown with the units of per grid-cell and the depth for  $R_h$  and SOC is 0-38 m.

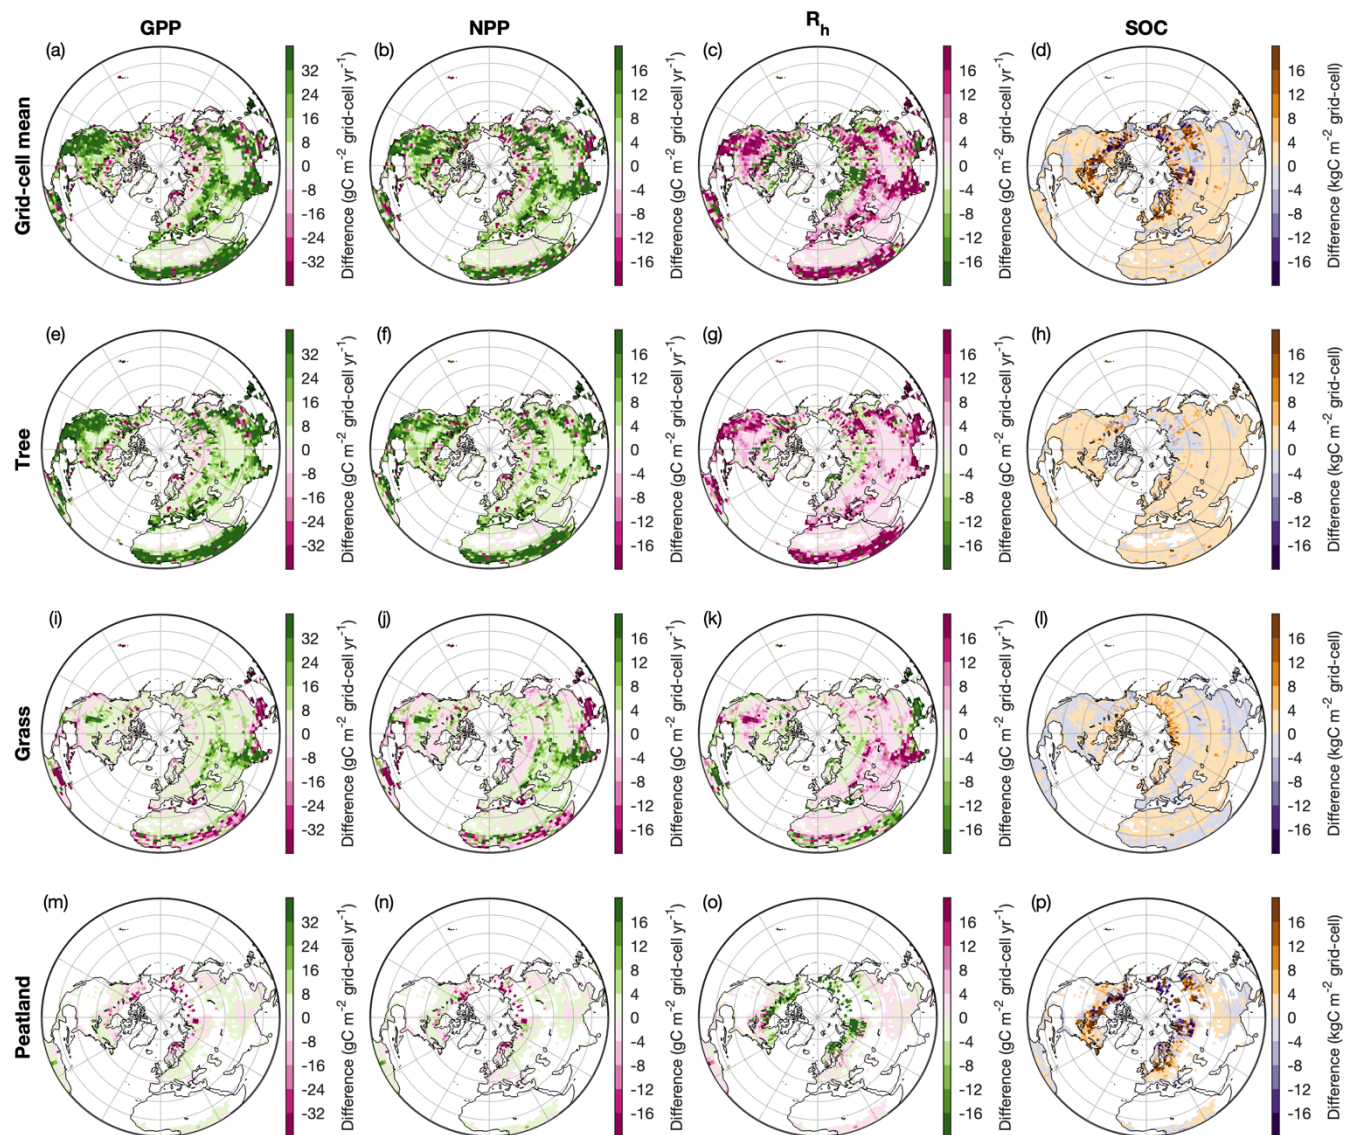

Figure S18. Comparison of land cover maps from simulations in this study and MODIS.

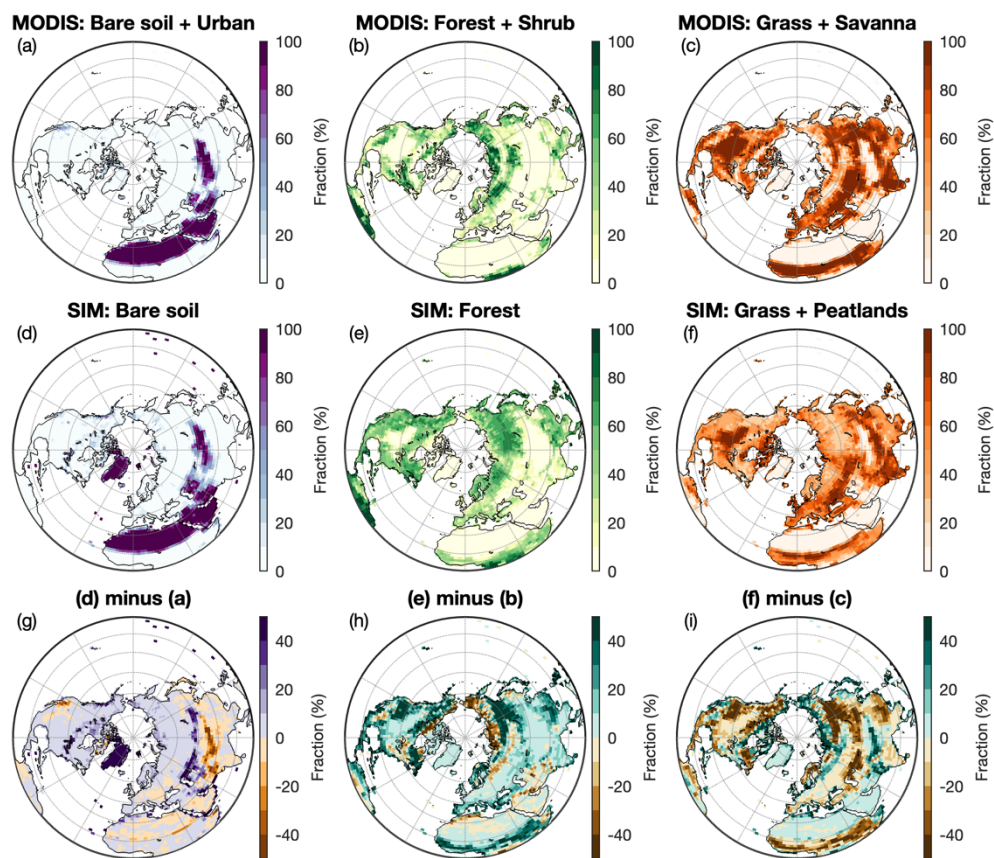

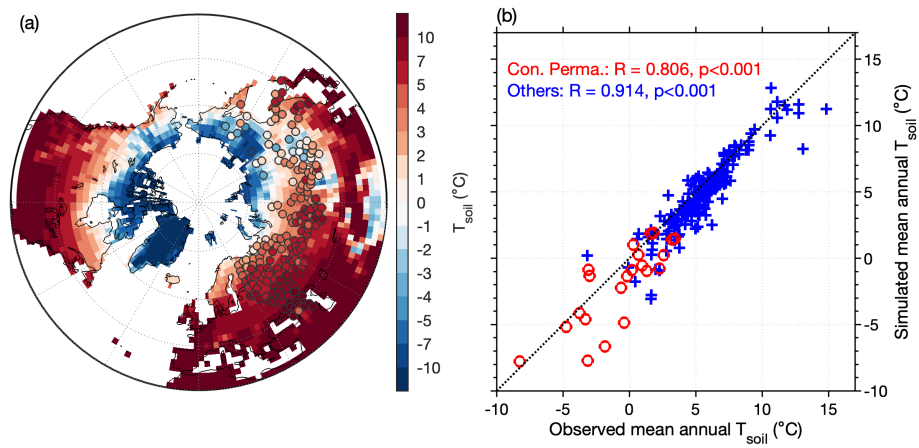

Figure S20. Same as Fig. 18, but for the permafrost areas defined by soil temperature.

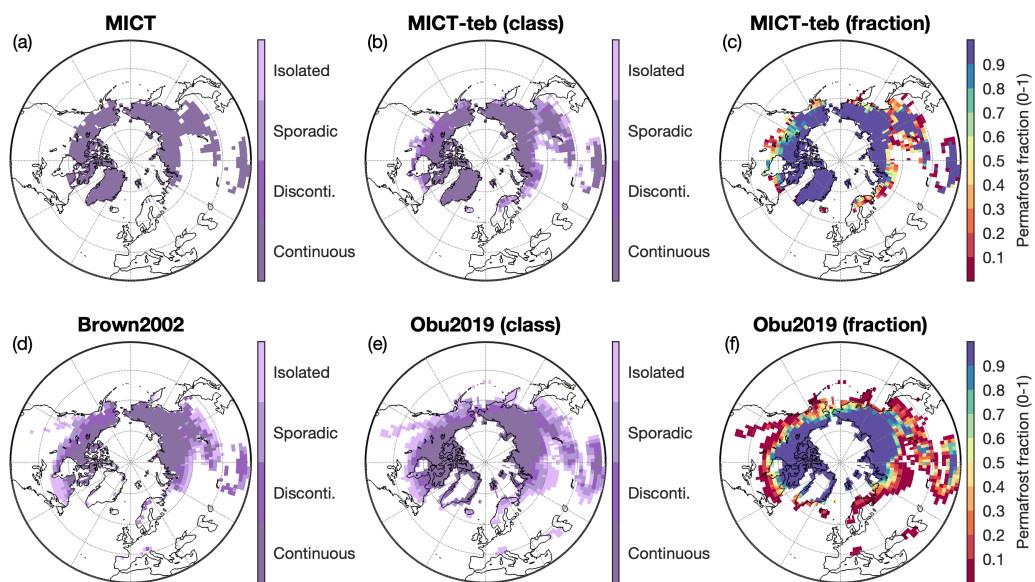

130
